October 23, 2019

## Effects of physiological parameter evolution on the dynamics of tonic-clonic seizures

Farah Deeba<sup>1,2,3\*</sup>, Paula Sanz-Leon<sup>1,2</sup>, and P. A. Robinson<sup>1,2</sup>

**1** School of Physics, University of Sydney, NSW 2006, Australia

**2** Center for Integrative Brain Function, University of Sydney, NSW 2006, Australia

**3** Department of Physics, Dhaka University of Engineering and Technology, Gazipur 1700, Bangladesh

\* farah.deeba@sydney.edu.au

### Abstract

The temporal and spectral characteristics of tonic-clonic seizures are investigated using a neural field model of the corticothalamic system in the presence of a temporally varying connection strength between the cerebral cortex and thalamus. Increasing connection strength drives the system into  $\sim 10$  Hz seizure oscillations once a threshold is passed and a subcritical Hopf bifurcation occurs. In this study, the spectral and temporal characteristics of tonic-clonic seizures are explored as functions of the relevant properties of physiological connection strengths, such as maximum strength, time above threshold, and the ramp rate at which the strength increases or decreases. Analysis shows that the seizure onset time decreases with the maximum connection strength and time above threshold, but increases with the ramp rate. Seizure duration and offset time increase with maximum connection strength, time above threshold, and rate of change. Spectral analysis reveals that the power of nonlinear harmonics and the duration of the oscillations increase as the maximum connection strength and the time above threshold increase. A secondary limit cycle at  $\sim 18$  Hz, termed a saddle-cycle, is also seen during seizure onset and becomes more prominent and robust with increasing ramp rate. If the time above the threshold is too small, the system does not reach the

10 Hz limit cycle, and only exhibits 18 Hz saddle-cycle oscillations. It is also seen that the times to reach the saturated large amplitude limit-cycle seizure oscillation from both the instability threshold and from the end of the saddle-cycle oscillations are inversely proportional to the square root of the ramp rate.

## Author Summary

1 Epilepsy, which is characterized by recurrent seizures, affects around 1% of the world  
2 population at some point in their lives. Tonic-clonic seizures are the most commonly  
3 encountered primary generalized seizures and it is widely considered that they can be  
4 induced by an increase in the connection strength between the cerebral cortex and the  
5 thalamus. In this paper, we analyze the detailed dynamics of tonic-clonic seizures along  
6 with their dependence on the parameters of the changing connection strength. We study  
7 the relationship of the seizure onset, offset, oscillation strength, and oscillation  
8 frequency to the duration, amplitude, and rate of change of the connection strength. A  
9 detailed understanding of the dynamics and their dependence on the physiological  
10 parameters of the brain may explain the variability of seizure dynamics among patients.  
11 It may also help to constitute successful seizure prediction.

## 12 Introduction

13 Tonic-clonic seizures, formerly known as grand mal seizures, are the most frequently  
14 encountered generalized seizures [1]. These seizures have a tonic phase, which is  
15 characterized by an initial increase in tone of certain muscles, followed by a clonic phase,  
16 which involves bilateral symmetric jerking of the extremities [2]. Tonic-clonic seizures  
17 have markedly different pre- and post-ictal electroencephalograms (EEG) and typically  
18 last 1 to 3 minutes. Primary generalized seizures, which is one of the most commonly  
19 seen seizures, begin simultaneously across the whole cortex [1].

20 A number of authors have investigated the mechanisms of seizures using the neural  
21 network and neural field approaches [3–13]. Many authors have proposed that  
22 transitions from healthy state to the seizure state occur via bifurcations upon changing  
23 physiological parameters [3–9, 12, 13]. For example, depending on the instability region,

24 increasing excitatory connection strengths between cortex and thalamus drives the  
25 system into  $\sim 10$  Hz and  $\sim 3$  Hz seizure oscillations via a subcritical and supercritical  
26 Hopf bifurcation, respectively, once a critical value (i.e., a threshold) is  
27 passed [3–9, 12, 13]. Results from *in vivo* studies have provided evidence that changes in  
28 corticothalamic connection strengths can induce seizures [12, 14–16], which possibly  
29 occur due to a key cellular event triggered by GABA<sub>B</sub> (metabotropic transmembrane  
30 receptors for gamma-aminobutyric acid) mediated mechanisms underlying the reduction  
31 of the threshold for Ca<sup>2+</sup> spikes [1, 2] due to the effects of drugs, excess or deficiency of  
32 neurotransmitters or neuromodulators [1, 2, 17]. However, the detailed dynamics of  
33 generalized tonic-clonic seizure including its dependence to the changing profile of the  
34 corticothalamic connection strength have never been studied in detail. The dependence  
35 of the spectral characteristics like the frequencies of the oscillations on the parameters  
36 of the changing connection strength have also not been studied.

37 In this study, we apply a widely used neural field model of the corticothalamic  
38 system to study the dynamics of tonic-clonic seizures [3–5, 7, 8, 18–20]. Neural field  
39 theory (NFT) is a continuum approach that predicts the average dynamics of large  
40 numbers of neurons [21, 22]. The specific model used here [23–26] has reproduced and  
41 unified many observed features of brain activity based on the physiology, including  
42 evoked response potentials [27], activity spectra [28], arousal state dynamics, age-related  
43 changes in the physiology of the brain [29], and many other  
44 phenomena [3–5, 7, 8, 18–20, 30–32]. The above NFT model has also been used in seizure  
45 studies [3–5, 7], where it has successfully unified features of tonic-clonic and absence  
46 seizures [3–5, 7], and explain the dependence of the dynamics and interictal oscillations  
47 during absence seizures on the parameters of the changing connection strength between  
48 the cortex and the thalamus [33, 34]. Previous studies have shown that a gradual  
49 increase of the connection strength between the cortex and thalamus near the alpha  
50 instability boundary shown in [8] in this model can initiate nonlinear dynamics whose  
51 characteristics closely resemble those of tonic-clonic seizures as a result of a subcritical  
52 Hopf bifurcation that destabilizes the  $\sim 10$  Hz alpha resonance [3, 4, 19, 31]. Changes in  
53 other connection strengths also introduce similar dynamics because of the universality  
54 properties of the Hopf bifurcation [12].

55 The general property and bifurcation mechanism of the resultant tonic-clonic seizure

56 has been studied in detail in [3]. However, the impact of underlying parameter changes  
57 of the corticothalamic connectivity strength on tonic-clonic seizure onset, dynamics, and  
58 termination have not been studied in detail. In particular, an extensive study like [33]  
59 on the dependence of the onset and termination of tonic-clonic seizure on the temporal  
60 form of the connection strength is necessary to understand the variability in seizure  
61 events, such as difference in the onset time and duration among different subjects, and  
62 to help lay the foundations for tonic-clonic seizure control strategies. These analysis are  
63 also necessary to explain the changes in harmonic structures seen in previous  
64 studies [35–37] during seizure. In sort, the aims are to understand the effects of  
65 physiological parameters on the temporal and spectral characteristics of seizure  
66 dynamics, including saddle-cycle oscillations [19].

67 The outline of this paper is as follows: In the Results, we explore the general  
68 characteristics of seizure as well as the dependence of seizure dynamics on the temporal  
69 variation of connection strength. In the Discussion, we provide a summary and discuss  
70 possible applications of our outcomes and finally, in the Methods section, we present the  
71 corticothalamic neural field model along with the temporal variation function and the  
72 numerical methods.

## 73 Results

74 In this section we investigate the dynamical characteristics of model tonic-clonic seizures  
75 as well as the effects of the temporal variation of the corticothalamic connection  
76 strength,  $\nu_{se}$  on the dynamics. For the investigation of general characteristics, we keep a  
77 constant maximum connection strength  $\nu_{max}$ , characteristic duration  $t_2 - t_1$ , and  
78 characteristic rise time  $\Delta$ , and all other parameters listed in Table 1.

79 To investigate the effect of the variation of  $\nu_{se}$  on seizure dynamics we vary  $\nu_{max}$ ,  $\Delta$ ,  
80 and  $t_2 - t_1$  individually by keeping all other parameters constant. Figure 1(a) shows the  
81 variation of  $\nu_{se}$  with time for the parameters values specified in Table 1.

### 82 General characteristics of tonic-clonic seizures

83 Three main regions are distinguished according to the dynamics of the cortical activity  
84  $\phi_e$  (cortical excitatory field) as illustrated in Fig. 1(b): Region I from 0 – 50 s is the

85 pre-ictal state when  $\nu_{se}$  is too small to initiate seizure-like oscillations; Region II from  
86 125 – 175 s is the ictal state when  $\nu_{se}$  is around its maximum value,  $\nu_{max}$ , and the  
87 system oscillates with maximum amplitude; and Region III from 250 – 330 s is the  
88 post-ictal state, where  $\nu_{se}$  returns to its baseline value, and oscillations start decreasing  
89 in amplitude until they completely cease.

90 Figures 1(c) and (d) show the zoomed seizure onset and offset, respectively, which  
91 are the transitions from Region I to II, and from Region II to III, respectively.

92 The normalized power spectrum in Region II is shown in Fig. 1(e). Figure 1(e)  
93 shows a dominant resonance at  $\sim 10$  Hz with multiple harmonics in Region II, where  
94 power decreases gradually with frequency.

### 95 **Dynamics of seizure onset**

96 Figure 1(b) shows that in Region I, the system remains in the steady state because  $\nu_{se}$  is  
97 below the bifurcation threshold. A small increase in  $\phi_e$  due to the increase of  $\nu_{se}$  is also  
98 seen in this region. At  $t = t_\theta$ , which is the time at which  $\nu_{se}$  crosses the linear instability  
99 threshold, the fixed point loses its stability, and  $\sim 18$  Hz oscillations appear. The first  
100 few oscillations are too small to be distinguished on this scale, but their envelope  
101 increases exponentially until  $t = t_{sc}$ , when the trajectory spirals further outwards to a  
102 large amplitude 10 Hz limit cycle, as seen in Fig. 1(c); these 18 Hz oscillations are  
103 termed saddle-cycle oscillations because they are due to a saddle cycle located between  
104 the stable steady state and the stable large amplitude limit cycle attractor. The  
105 envelope of the 10 Hz oscillations continues to increase from  $t = t_{sc}$  until  $t = t_{lc}$ , when  
106 the system reaches the large amplitude limit cycle. At  $t \approx t_{lc}$ , the amplitude of the  
107 oscillations overshoots because  $\nu_{se}$  is still rapidly increasing. Then, the amplitude of the  
108 oscillations increases gradually until  $\nu_{se} = \nu_{max}$  in Region II, then decreases.

109 Figure 1(c) shows a clearer view of saddle-cycle oscillations, and times  $t_{sc}$  and  $t_{lc}$ ;  
110 where we define  $t_{lc}$  to be the point of inflection.

### 111 **Dynamics of seizure offset**

112 In Fig. 1(d), we see that the amplitude of the oscillations decreases gradually from its  
113 peak during the ramp down of  $\nu_{se}$ . More specifically, at  $t = t_{lc2}$ , when  $\nu_{se}$  crosses the  
114 offset bifurcation threshold  $\nu_{lc2} = 0.98$  mV s [3], the large limit cycle loses stability and

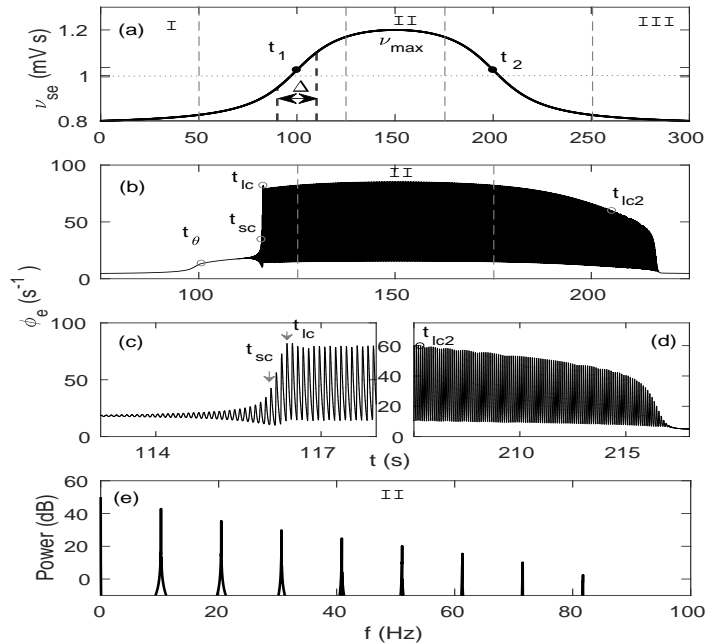

**Fig 1.** Corticothalamic dynamics for temporally varying  $\nu_{se}$ , with  $\Delta = 20$  s and rest of the parameters shown in Table 1. (a) Temporal profile of  $\nu_{se}$  varying from  $\nu_0$  to  $\nu_{max}$  and back. Three different regions are identified: I = pre-ictal state, II = ictal state, and III = post-ictal state. (b) Cortical excitatory field  $\phi_e$  vs.  $t$ , showing a 10 Hz spike-wave oscillation. Individual oscillations can not be distinguished on this scale. (c) Zoom of  $\phi_e$  at seizure onset. (d) Zoom of  $\phi_e$  at seizure offset. (e) Power spectrum of  $\phi_e$  in Region II. An arbitrary dB scaling is used because clinical EEG recordings involve additional attenuation by structures between the cortex and the electrode, which we do not model here.

115 the oscillation amplitude decreases steeply to approach the stable steady state in Region  
 116 III.

### 117 Differences between onset and offset dynamics

118 Comparing Fig. 1(c) with Fig. 1(d), we see that  $\nu_\theta > \nu_{lc2}$ , as expected for transitions  
 119 due to a subcritical Hopf bifurcation. This is further seen in Fig. 2, where we see that  
 120 the system bifurcates from the fixed point at  $\nu_{se} = \nu_\theta$  and reaches the saturated large  
 121 amplitude attractor at  $\nu_{se} = \nu_{lc}$ . As  $\nu_{se}$  decreases, the large amplitude attractor  
 122 becomes unstable at  $\nu_{se} = \nu_{lc2}$  and the system returns toward the fixed point.

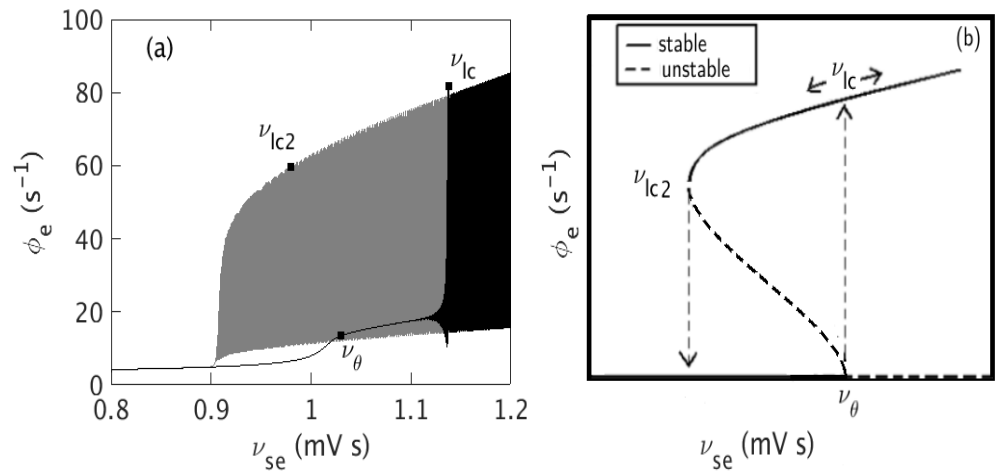

**Fig 2.** Hysteresis between seizure onset and offset. (a)  $\nu_{se}$  vs.  $\phi_e$ . Black color shows the variation of  $\phi_e$  during ramp up, i.e. during onset, and gray color shows the variation of  $\phi_e$  during ramp down, i.e. during offset. (b) A schematic diagram of the hysteresis. Solid lines show stable states and dashed lines show unstable ones.

### 123 Analytical prediction of onset and offset transition times

124 Paralleling the analytic prediction of the characteristic time required to develop absence  
125 seizures [33], we next predict characteristic tonic-clonic onset and offset times.

126 For  $\nu(t) \approx \nu_{\theta}$ , the oscillation amplitude  $A$  obeys

$$\frac{dA}{dt} \approx C [\nu(t) - \nu_{\theta}] A, \quad (1)$$

127 where  $C$  is a constant, and  $\nu(t)$  is the instantaneous value of  $\nu_{se}$ . Because  $\nu_{se}$  only  
128 varies with time  $t$ , we can make the approximation  $\nu(t) - \nu_{\theta} \approx c(t - t_{\theta})$  near the  
129 threshold, when the oscillation starts at  $A_{\theta}$ . This yields

$$A = A_{\theta} \exp \left[ c(t - t_{\theta})^2 / 2 \right]. \quad (2)$$

130 with  $c = C d\nu(t)/dt|_{t=t_{\theta}}$ ; then  $A = A_{lc}$  at  $t = t_{lc}$

$$\exp \left[ \frac{c(t_{lc} - t_{\theta})^2}{2} \right] = \frac{A_{lc}}{A_{\theta}}, \quad (3)$$

$$t_{lc} - t_{\theta} = \frac{k}{\sqrt{d\nu(t)/dt|_{t=t_{\theta}}}}, \quad (4)$$

131 where  $k = [(2/C) \ln(A_{lc}/A_{\theta})]^{1/2}$ . Similar analysis predicts that the transition time  
132  $t_{lc} - t_{sc}$  from the saddle-cycle attractor to the larger limit cycle also follows this scaling.

133 The decrease of oscillation amplitude during the ramp down period can be  
134 approximated as

$$\frac{dA}{dt} \approx -C' [\nu(t) - \nu_{lc2}] A, \quad (5)$$

$$\frac{dA}{dt} = -C'' [t - t_{lc2}] A, \quad (6)$$

135 where  $C'$  and  $C''$  are constants, and  $t_{lc2}$  is the offset bifurcation threshold as mentioned  
136 in previous sections. This yields

$$\ln(A/A_{lc2}) = -\frac{C''}{2} (t - t_{lc2})^2, \quad (7)$$

137 which indicates a superexponential decrease during seizure offset.

### 138 Dynamics during ictal state plateau

139 Figure 3 shows the phase space trajectory of  $\phi_e$  for the default parameters in Table 1,  
140 except  $\Delta = 2$  s, which we use to see the saddle-cycle attractor more clearly. Figure 3(a)  
141 shows the trajectory of  $\phi_e$  on the  $\phi_e - d\phi_e/dt$  plane. In the left edge of the figure, we  
142 see the evolving fixed point, which first appears as straight line and then moves towards  
143 the right with increasing  $\nu_{se}$ . Once the system crosses the linear instability threshold,  
144 the fixed point becomes unstable and the trajectory spirals out to a large amplitude  
145 limit cycle attractor via an unstable saddle-cycle attractor. The amplitude of the large  
146 attractor increases gradually until  $\nu_{se} = \nu_{max}$ , then decreases until  $\nu_{lc2}$ , where it  
147 becomes unstable and the system spirals back to the stable fixed point; no saddle-cycle  
148 is seen during the inward spiral. Three segments of the trajectory are shown in Figs  
149 3(b) – (d), to clarify these dynamics. Figure 3(b) shows  $\phi_e$  spiraling outward from the  
150 steady state to the saddle-cycle attractor with amplitude  $\approx 30$  s<sup>-1</sup>. Figure 3(c) shows  
151 the outward spiral from the saddle cycle to the limit cycle attractor with amplitude  
152  $\approx 90$  s<sup>-1</sup>. Figure 3(d) shows the inward spiral during ramp down of  $\nu_{se}$ .

153 Figure 4 shows the dynamic spectrum of  $\phi_e$  from Fig. 1(b). A sudden appearance of  
154 10 Hz oscillation with multiple harmonics at  $t = t_\theta$  is seen. These harmonics resemble  
155 with the harmonics seen in [3], both experimentally and theoretically. The power of the  
156 harmonics decreases with harmonic number and their duration decreases slightly. We



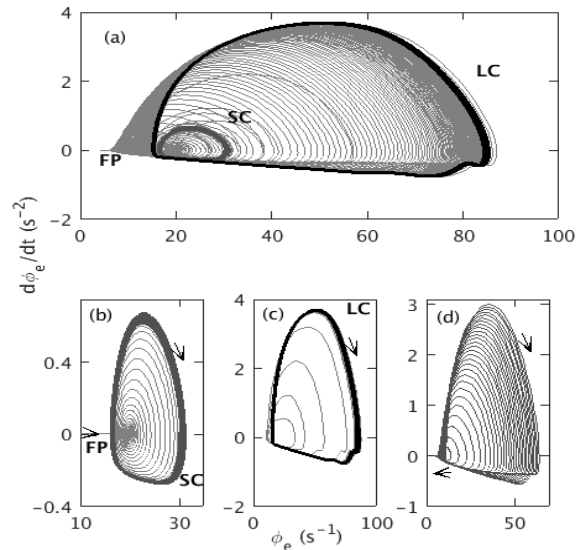

**Fig 3.** Phase space trajectory of  $\phi_e$  for  $\Delta = 2$  s, and rest of the default parameters as in Table 1. (a) Trajectory from from  $t = 5$  s to  $t = 295$  s. Initial small straight line labeled with FP corresponds to the evolving fixed point; small dark gray segment labeled with SC corresponds to the saddle-cycle attractor; black segment labeled with LC corresponds to the large amplitude limit cycle attractor. The fixed point and center of the clockwise limit cycle trajectory move from left to right during ramp up and right to left during ramp down. (b) Trajectory from  $t = 104$  s to  $t = 107$  s. (c) Trajectory from  $t = 114.5$  s to  $t = 150$  s. (d) Trajectory from  $t = 200$  s to  $t = 295$  s.

157 find a frequency broadening during the seizure onset at  $\sim 113.5$  s, due to the rapid  
 158 change of the amplitude of the oscillations. Frequency broadening of the first few  
 159 harmonics during seizure offset is also seen, and there is a slight frequency drop.

### 160 Dynamics of corticothalamic seizure propagation

161 Figures 5 (a) and (b) show the time series of the fields  $\phi_r$  during onset and offset,  
 162 respectively. Similarly, Figs 5 (c) and (d) show the time series of the fields  $\phi_s$  during  
 163 onset and offset.

164 From these plots we observe that (i) during onset  $\phi_r$  reaches much higher amplitudes  
 165 than  $\phi_e$ ; and, (ii) the ratio between the amplitude of the small oscillations that develop  
 166 after crossing the bifurcation and the amplitude of the saturated limit cycle is smaller  
 167 for  $\phi_e$  than it is for  $\phi_r$  and  $\phi_s$ .

168 In order to study the interplay among  $\phi_e$ ,  $\phi_r$ , and  $\phi_s$  in more detail, we plot their  
 169 limit cycle phase space trajectories and time series at  $\nu_{se} \approx \nu_{max}$  in Fig. 6. Figures 6(a)

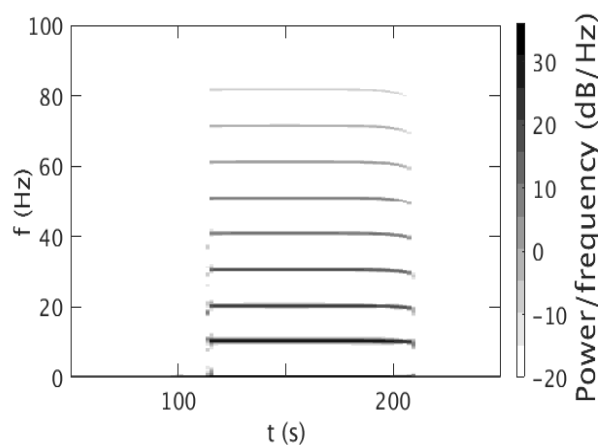

**Fig 4.** Dynamic spectrum for  $\nu_{\max} = 1.2$  mV s with the parameters in Table 1. A Hanning window of 600 data points, an overlap of 200 points, and sampling frequency of 200 Hz was used. The color bar shows the dB scale.

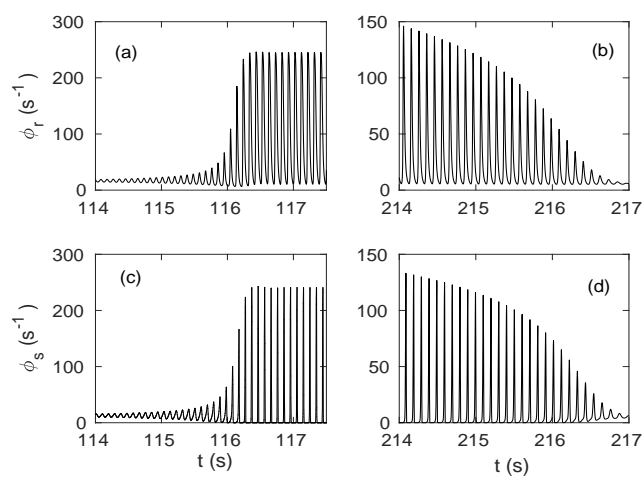

**Fig 5.** Time series of fields during seizure onset and offset: (a)  $\phi_r$  at seizure onset. (b)  $\phi_r$  at seizure offset. (c)  $\phi_s$  at seizure onset. (d)  $\phi_s$  at seizure offset.

170 and (b) show the time series and phase space trajectory of  $\phi_e$ , respectively. Figures 6(c)  
171 and (d) show the time series and phase space trajectory of  $\phi_r$ , respectively. A  $t_0/2$  time  
172 shift between the peaks of  $\phi_e$  and  $\phi_r$  is seen due to the propagation delay between these  
173 populations. We also see a wide minimum between two successive peaks of  $\phi_r$ . The  
174 phase space in Fig. 6(d) shows similar trajectory to Fig. 6(d), but with greater  
175 amplitude. Figures 6(e) and (f) show the time series and phase space of  $\phi_s$ , respectively,  
176 and they show an equal amplitude but wider peak than Figs 6(c) and (d). Figure 6  
177 shows that all three fields exhibit slightly different trajectories, with the higher  
178 amplitudes of  $\phi_r$  and  $\phi_s$  near the maximum firing rate.

179 Close examination of Fig. 6 reveals the signal flow through the populations. A peak  
180 of  $\phi_e$  reaches  $\phi_r$  and  $\phi_s$  simultaneously  $t_0/2$  later. The peak of  $\phi_e$  coincides  
181 approximately with the bottom of the trough of  $\phi_r$ , and a positive excitation with the  
182 maximum firing rate appears, which suppress  $\phi_s$ . This suppression then reduce the  
183 excitation of  $\phi_e$  a time  $t_0/2$  later and causes an exponential decay. A negative  
184 perturbation to  $\phi_e$  results, which then propagates to the thalamus again and reduces  
185 the excitation of  $\phi_r$  after a further time  $t_0/2$ , which allows a positive excitation of  $\phi_s$   
186 almost immediately. This positive excitation then flows to  $\phi_e$  and initializes the next  
187 cycle of the loop.

188 In molecular level, the imbalance between inhibitory and excitatory conductances  
189 induced by blocking synaptic and voltage-gated inhibitory conductances, or by  
190 activating synaptic and voltage-gated excitatory conductances incorporates the positive  
191 feedback, which leads to seizures [17,38]. Seizures are suppressed by the opposite  
192 manipulations: increasing inhibition or decreasing excitation [17,38].

### 193 **Impact of temporal variation of $\nu_{se}$ on seizure dynamics**

194 In this section, we investigate the effects of the temporal variation of  $\nu_{se}$  on the model  
195 seizure dynamics by varying the maximum connection strength  $\nu_{\max}$ , duration  $t_2 - t_1$ ,  
196 and rise time  $\Delta$ , holding all other parameters at the values in Table 1.

197 We first analyze the impact of the variation of  $\nu_{se}$  on the overall dynamics of  $\phi_e$ , as  
198 shown in Fig. 7. For  $\nu_{\max} = 1$  mV s in Fig. 7(a),  $\phi_e$  increases with  $\nu_{se}$  as shown in  
199 Fig. 16, then returns smoothly to the initial steady state value as  $\nu_{se}$  returns to  $\nu_0$ .

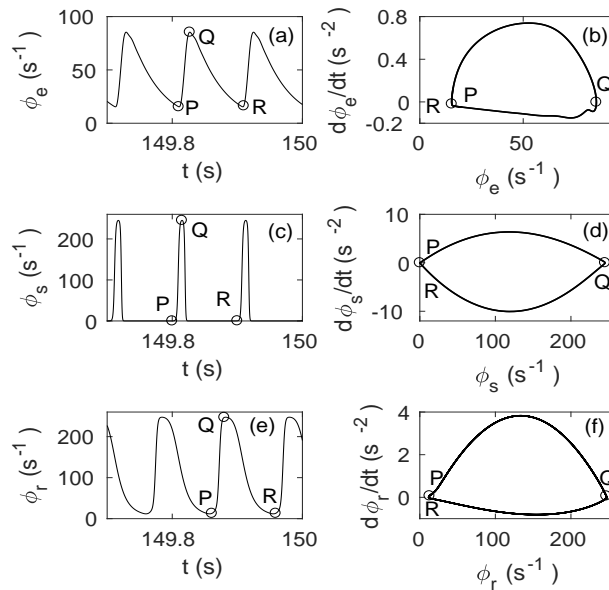

**Fig 6.** Mid-seizure limit cycle dynamics of  $\phi_e$ ,  $\phi_s$ , and  $\phi_r$  from  $t = 149.7$  s to  $t = 150$  s with other parameters as in Table 1. (a) Time series of  $\phi_e$  at  $\nu_{se} \approx \nu_{max}$ . (b) Phase space trajectory of  $\phi_e$ . (c)  $\phi_r$  at  $\nu_{se} \approx \nu_{max}$ . (d) Trajectory of  $\phi_r$ . (e)  $\phi_s$  at  $\nu_{se} \approx \nu_{max}$ . (f) Trajectory of  $\phi_s$ . P and R are successive minimums and Q is the intermediate maximum.

200 Figures 7(b) and (c) show that increasing  $\nu_{max}$ , yields periodic oscillations of increasing  
 201 magnitude as corticothalamic feedback strengthens; oscillations also start earlier and are  
 202 damped away later because the system crosses onset threshold earlier and offset  
 203 threshold later for higher  $\nu_{max}$ . However, the system does not return to its initial steady  
 204 state for  $\nu_{max} > 1.542$  mV s; instead it moves to the high firing steady state of Fig. 16.

205 Figures 7(d) – (f) show the effects of varying ramp width  $\Delta$  from 2 s to 60 s. Figure  
 206 7(d) shows that for the step-like variation of  $\nu_{se}$  for  $\Delta = 2$  s, the oscillations rapidly  
 207 reach maximum amplitude after the transition to the large amplitude attractor and also  
 208 decrease sharply from their maximum to the initial steady state once the system crosses  
 209 the threshold during ramp down. Figures 7(e) and (f) show that the slower ramp for  
 210 larger  $\Delta$  implies that the amplitude of the oscillations during seizure onset and offset  
 211 decreases more gradually.

212 Figures 7(g) – (i) show the effects of variation of the characteristic time  $t_2 - t_1$  from  
 213 20 s to 100 s. As expected, the duration of seizure oscillations increases with  $t_2 - t_1$ .

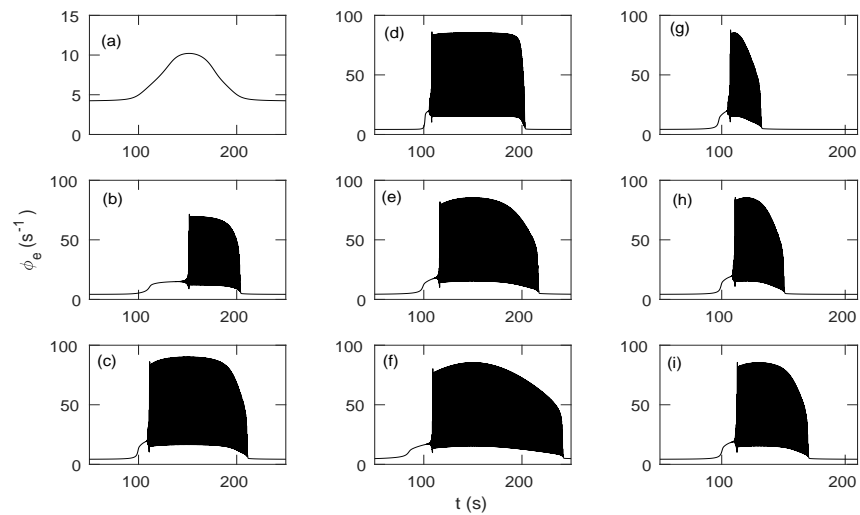

**Fig 7.** Time series for different temporal profiles of  $\nu_{se}$ , with other parameters as in Table 1. (a)  $\phi_e$  vs.  $t$  for  $\nu_{\max} = 1$  mV s. Individual oscillations cannot be distinguished. (b)  $\nu_{\max} = 1.05$  mV s. (c)  $\nu_{\max} = 1.25$  mV s. (d)  $\Delta = 2$  s. (e)  $\Delta = 20$  s. (f)  $\Delta = 60$  s. (g)  $t_2 - t_1 = 20$  s. (h)  $t_2 - t_1 = 40$  s. (i)  $t_2 - t_1 = 60$  s.

#### 214 Seizure onset time

215 Figure 8 quantifies the effects of  $\nu_{\max}$  and  $\Delta$  on seizure onset. We do not revisit the  
 216 variation with  $t_2 - t_1$  because its effects were already discussed in the previous  
 217 subsection.

218 Figure 8(a) shows that  $t_\theta$  decreases with increasing  $\nu_{\max}$ , because the system reaches  
 219  $\nu_\theta$  earlier for a higher  $\nu_{\max}$ . Figure 8(b) shows the variation of  $t_\theta$  with  $\Delta$ . For  $\Delta < 10$  s,  
 220  $t_\theta$  increases slightly with  $\Delta$ , because due to the high rate of change,  $\nu_{se}$  rapidly  
 221 approaches its maximum, crossing all the bifurcation values. At longer  $\Delta \geq 10$  s, the  
 222 temporal profile of  $\nu_{se}$  becomes smooth and flat topped like Fig. 1(a) and  $\nu_{se}$  gradually  
 223 ramps up to the bifurcation point, so the system crosses the threshold later for a larger  
 224  $\Delta$ , resulting in a decrease in  $t_\theta$ .

#### 225 Dynamic spectrum

226 In this section we discuss the effects of changing the temporal profile of  $\nu_{se}$  on the power  
 227 spectrum of  $\phi_e$  and use its evolution to further clarify the occurrence of saddle cycles.

228 Figure 9(a) shows the dynamic spectrum for  $\nu_{\max} = 1.05$  mV s. During the seizure,  
 229 we observe a peak at approximately  $\sim 10$  Hz with several harmonics. We also find lower

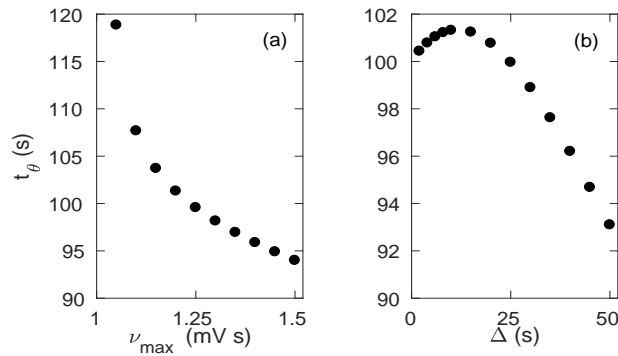

**Fig 8.** Effects of temporal variation of  $\nu_{se}$  on seizure onset with parameters as in Table 1. (a)  $t_\theta$  vs.  $\nu_{\max}$ . (b)  $t_\theta$  vs.  $\Delta$ .

230 frequency drop and broadening during seizure onset and offset as in Fig. 4. Figure 9(b)  
 231 shows that for  $\nu_{\max} = 1.15$  mV s, harmonics have greater duration and power than  
 232 Fig. 9(a); frequency broadening is also more prominent. Figure 9(c) shows that for  
 233  $\nu_{\max} = 1.55$  mV s, there is no oscillation after  $t = 143.52$  s. A detailed investigation  
 234 shows that the power of the peaks increases significantly with  $\nu_{\max}$  and  $t_2 - t_1$ , but  
 235 decreases slightly with  $\Delta$ , especially at higher order harmonics. A small peak around  
 236 205 s shows that the system returns to the initial steady state via small oscillation after  
 237 it crosses the offset bifurcation.

### 238 Characteristic transition times

239 In this section we test the analytic prediction made in earlier sections. Figure 10(a)  
 240 shows  $t_{lc} - t_\theta$  vs.  $(d\nu_{se}/dt)^{-1/2}$ . A least-squares fit to these data yields

$$t_{lc} - t_\theta = a(d\nu_{se}/dt)^{-\frac{1}{2}} - b, \quad (8)$$

241 with  $a = (0.042 \pm 0.004)$  V<sup>1/2</sup> s and  $b = (0.9 \pm 1.4)$  s, which is consistent with Eq. (4).

242 Figure 10(b) shows  $(d\nu_{se}/dt)^{-1/2}$  vs.  $t_{lc} - t_{sc}$ . A least-squares fit yields

$$t_{lc} - t_{sc} = a'(d\nu_{se}/dt)^{-\frac{1}{2}} + b', \quad (9)$$

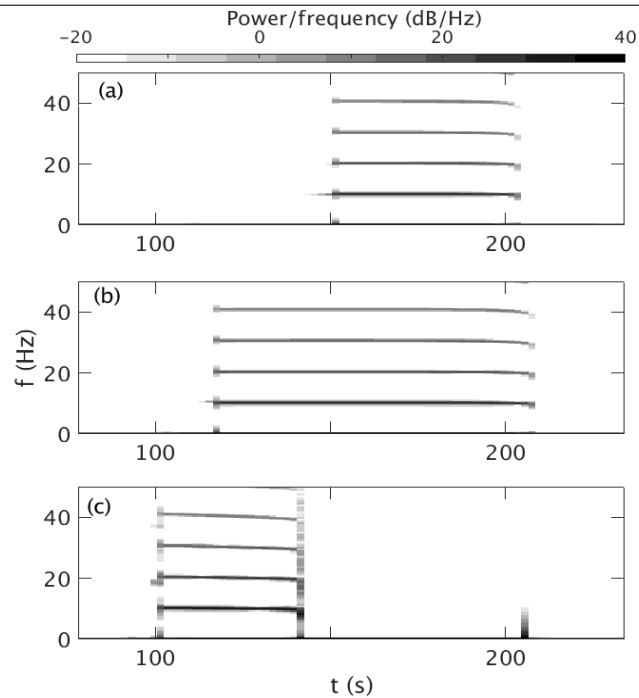

**Fig 9.** Dynamic spectrum vs.  $\nu_{\max}$  for the parameters in Table 1. The power density of the harmonics is calculated using a Hanning window of 600 data points, an overlap of 200 points, and sampling frequency of 200 Hz, the color bar at top shows the dB scale. (a) Dynamic spectrum for  $\nu_{\max} = 1.05$  mV s. (b)  $\nu_{\max} = 1.15$  mV s. (c)  $\nu_{\max} = 1.55$  mV s.

243 with  $a' = (0.003 \pm 0.001) \text{ V}^{1/2} \text{ s}$  and  $b' = (0.0 \pm 0.2) \text{ s}$ , which has the same scaling as  
 244 Eq. (4).

245 Figure 10(c) shows  $\ln(A/A_{lc2})$  vs.  $(t - t_{lc2})^2$  for  $\Delta = 10$  s, which follows Eq. (7)  
 246 until the amplitudes of the oscillations start to decrease super-exponentially towards the  
 247 steady state. A least-squares fit to the linear decrease yields

$$\ln(A/A_{lc2}) = -a''(t - t_{lc2})^2 - b'' \quad (10)$$

248 with  $a'' = (0.0116 \pm 0.0002) \text{ s}^{-2}$  and  $b'' = (0.018 \pm 0.004)$ . The figure shows that the  
 249 decrease of the envelope follow the linear fit for a relatively short time, after which the  
 250 decrease becomes steeper. By using Eqs (2) and (3), it can be also shown that decrease  
 251 within the linear region also follows the same scaling as Eq. (4).

## 252 Saddle Cycle

253 Previously, we mentioned the presence of a small amplitude  $\sim 18$  Hz saddle cycle. The  
 254 system orbits there for few seconds, then spirals out towards the large amplitude limit

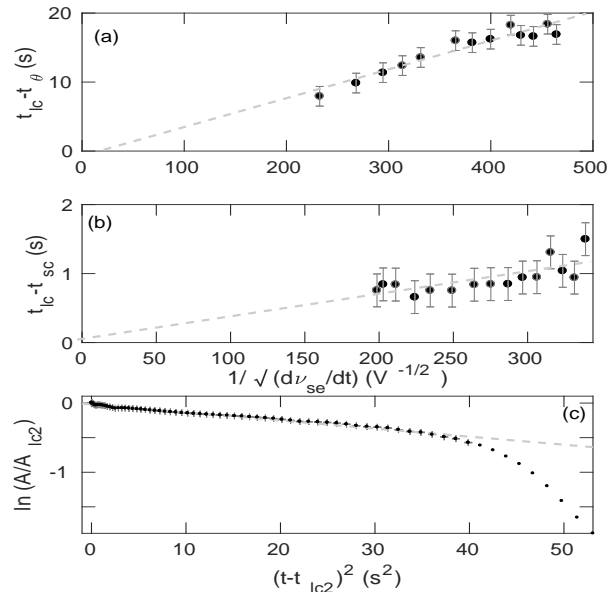

**Fig 10.** Dependence of seizure transition times on  $(dv_{se}/dt)^{-1/2}$  with the default parameters as in Table 1 and  $\Delta$  ranges from 2 s to 50 s. (a)  $t_{lc} - t_{\theta}$  vs.  $(dv_{se}/dt)^{-1/2}$ ; (b)  $t_{lc} - t_{sc}$  vs.  $(dv_{se}/dt)^{-1/2}$ , and (c)  $\ln(A/A_{lc2})$  vs.  $(t - t_{lc2})^2$  for  $\Delta = 10$  s and time ranges from 190 s to 250 s. Error bar represent uncertainties of the least-squares fits. Points with no error bars are not considered for the least-squares fit.

255 cycle attractor. However, this saddle-cycle is not observed in all cases, for example, a  
 256 colose zoom near the onset of all subfigures of Fig. 7 will show that the small amplitude  
 257 saddle-cycle oscillations like Fig. 1(c) are only prominent in Figs 7(c) and (d). Here, we  
 258 explore the dependence of the saddle-cycle oscillations on  $\nu_{max}$  and  $\Delta$ .

259 Figure 11 shows the variation of saddle-cycle oscillations with respect to  $\nu_{max}$ , with  
 260 other parameters as in Table 1. Figure 11(a) shows the phase space trajectory for  
 261  $\nu_{max} = 1.15$  mV s. No saddle-cycle attractor is seen in this figure. Figure 11(b) shows  
 262 the trajectory for  $\nu_{max} = 1.25$  mV s. A small saddle-cycle attractor is seen between the  
 263 fixed point and the large amplitude attractor. Figures 11(c) and (d) show the  
 264 trajectories for  $\nu_{max} = 1.35$  mV s and 1.45 mV s, respectively. The saddle cycle  
 265 increases in size with  $\nu_{max}$ . A similar investigation shows that similar phenomena occur  
 266 when  $\Delta$  is varied, with the saddle cycle being most prominent for small  $\Delta$ , completely  
 267 disappearing for  $\Delta \gtrsim 20$  s.

268 To understand the relation between the saddle-cycle oscillation and rate of change of  
 269  $\nu_{se}$  more clearly, we calculate the power spectrum for different  $\nu_{max}$  and  $\Delta$ . Figure 12(a)  
 270 shows the variation of the power spectrum with  $\nu_{max}$ . For a small  $\nu_{max}$ , there is no



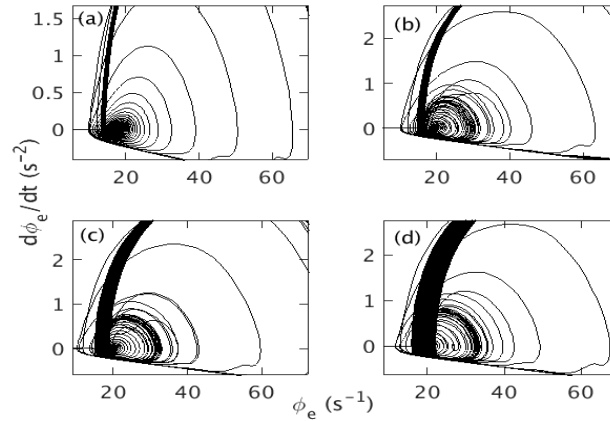

**Fig 11.** Effects of variation of  $\nu_{\max}$  on saddle-cycle with rest of the parameters as in

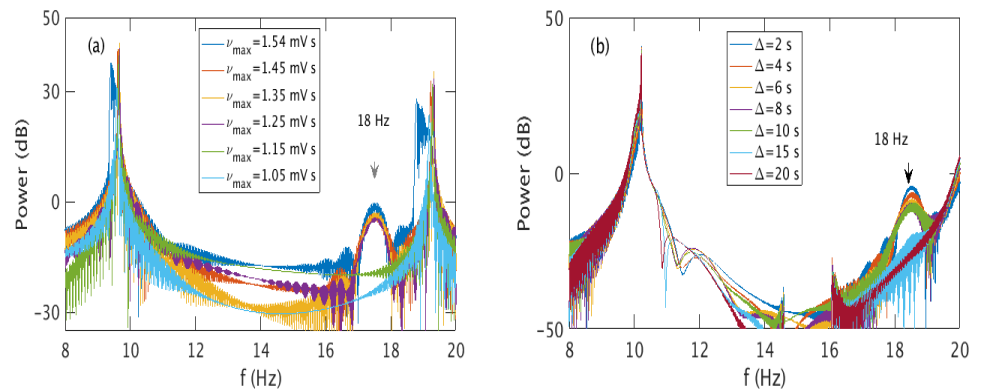

**Fig 12.** (Color online) Variation in the power of the saddle-cycle oscillations with rest of the parameters in Table 1. (a) Power spectrum vs.  $\nu_{\max}$ . (b) Power spectrum vs.  $\Delta$ . Legends show the corresponding values of  $\nu_{\max}$  and  $\Delta$ .

271 peak around 18 Hz, but a peak at approximately 18 Hz appears when  $\nu_{\max} \geq 1.2$  mV s  
 272 and becomes more prominent and strong with increasing  $\nu_{\max}$ . Figure 12(b) shows that  
 273 the power of the peak around 18 Hz decreases with  $\Delta$  and disappears for  $\Delta \gtrsim 20$  s.

274 These results imply that the presence of saddle-cycle oscillations depends on the rate  
 275 of change of  $\nu_{se}$ . Figure 13 illustrates the presence or absence of saddle-cycle  
 276 oscillations for 236 different combinations of  $\nu_{se}$  and  $\Delta$  as a function of the value of  
 277  $d\nu_{se}/dt$ . When  $d\nu_{se}/dt < 7 \times 10^{-3}$  mV, there are no saddle-cycle oscillations; for  
 278  $d\nu_{se}/dt > 9 \times 10^{-3}$  mV, the system always exhibits saddle-cycle oscillations; while for  
 279  $7 \times 10^{-3} \lesssim d\nu_{se}/dt \lesssim 9 \times 10^{-3}$  mV, there is a narrow mixed region where the presence  
 280 of saddle cycle cannot be predicted solely from the rate of change of  $\nu_{se}$ .

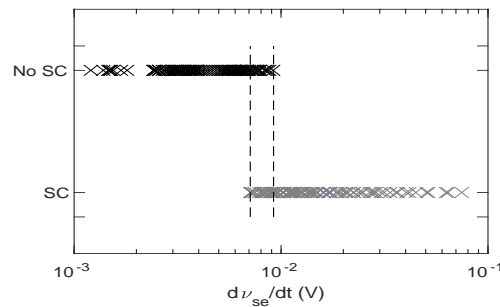

**Fig 13.** Dependence of saddle-cycle oscillations on  $d\nu_{se}/dt$ . Gray crosses show the presence of a saddle-cycle and black crosses show its absence.

281 In order to see why saddle cycles are only seen for high  $d\nu_{se}/dt$ , we show the time  
 282 evolution of 10 Hz and 18 Hz frequency peaks for  $\Delta = 2$  s and  $\Delta = 50$  s in Fig. 14  
 283 during seizure onset with other parameters as in Table 1. In Fig. 14(a), for  $\Delta = 50$  s  
 284 and  $d\nu_{se}/dt = 0.003$  mV, the 10 Hz peak always rise faster than the 18 Hz peak, and  
 285 hence, always has more power and dominates the spectrum; no saddle cycles are seen in  
 286 the trajectory. On the other hand, in Fig. 14(b), for  $\Delta = 2$  s and  $d\nu_{se}/dt = 0.03$  mV,  
 287 the 18 Hz peak rises faster than the 10 Hz peak during onset so there is a  $\sim 2$  s window  
 288 in which the 18 Hz peak dominates and hence, the system is seen to exhibit saddle-cycle  
 289 oscillations during onset in Fig. 1, after which the 10 Hz peak dominates. Now, since,  $\nu_{\theta}$   
 290 is a the bifurcation threshold and does not depend on the temporal profile, but  $\nu_{lc}$   
 291 depends on the temporal profile and the time to reach the 10 Hz limit cycle (i.e.,  
 292  $t_{lc} - t_{\theta}$ ), we conclude that  $\nu_{lc}$  is the parameter that defines the existence of the saddle  
 293 cycle. The system will exhibit saddle cycle oscillation only if  $\nu_{sc} > \nu_{lc}$  at  $t_{sc}$ .

## 294 Discussion

295 We have used an established neural field model of the corticothalamic system [3] to  
 296 study the dependence of tonic-clonic seizures on the temporal profile of a  
 297 corticothalamic connection strength  $\nu_{se}$  that induces seizures. The effects of varying  
 298 other connection strengths can also be qualitatively predicted using these outcomes  
 299 because they will exhibit similar dynamics due to the universality properties of the Hopf  
 300 bifurcation. Also, the function [Eq. (20)] used to vary the connection strength is an  
 301 approximation of what seems to occur in living systems. This function is an

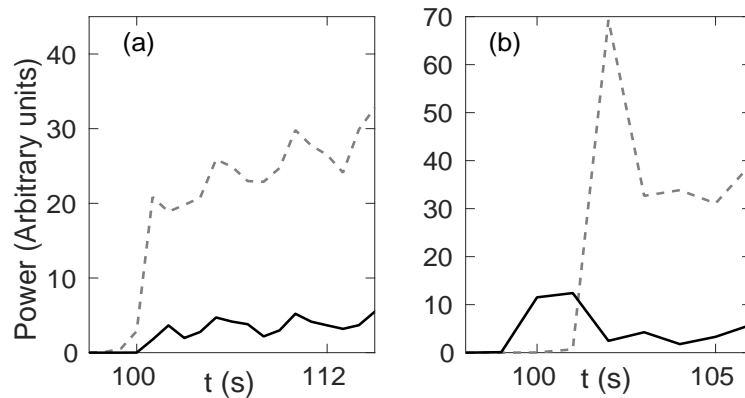

**Fig 14.** Temporal variation of frequency peaks during seizure onset; black solid line shows the  $\sim 18$  Hz peak; gray dashed line shows the  $\sim 10$  Hz peak with parameters from Table 1. (a)  $\Delta = 50$  s; (b)  $\Delta = 2$  s.

302 improvement over previous piece-wise linear functions [3]. The parameters and the  
 303 shape of Eq. (20) could be customized in the future using experimental data. The key  
 304 outcomes are:

305 (i) The system exhibits  $\sim 10$  Hz limit cycle oscillations once the connection strength  
 306 crosses the bifurcation threshold of  $\nu_{\theta} = 1.025$  mV s, which is the characteristic  
 307 frequency of tonic-clonic seizure via a subcritical Hopf bifurcation. The system returns  
 308 to the resting equilibrium when the connection strength decreases below the offset  
 309 threshold,  $\nu_{lc2} = 0.98$  mV s. The difference in onset and offset bifurcation values causes  
 310 hysteresis; consistent with previously published results that used piecewise linear  
 311 variation of  $\nu_{se}$ , rather than the present more realistic continuous gradual variation.

312 (ii) For  $\nu_{\max} \gtrsim 1.542$  mV, the system moves to another steady state near maximum  
 313 firing rate and only returns to the initial steady state once  $\nu_{se}$  returns below an offset  
 314 threshold.

315 (iii) The amplitude of  $\phi_e$  increases with the maximum connection strength,  $\nu_{\max}$ ,  
 316 because an increase of the connectivity strength increases the strength of the positive  
 317 feedback loop between the cortex and the thalamus.

318 (iv) Because increasing the maximum connection strength  $\nu_{\max}$  increases the  
 319 amplitudes of the oscillations, it increases the power and the characteristic number of  
 320 harmonics. The power of the harmonics also increases with the seizure duration  $t_2 - t_1$ ,  
 321 but decreases slightly with the ramp duration  $\Delta$ .

322 (v) The characteristic transition times required to reach the saturated limit cycle  
323 oscillation from the seizure threshold or the end of the saddle-cycle oscillations to the  
324 steady state are predicted and verified numerically to be inversely proportional to the  
325 square root of the rate of change of the connection strength.

326 (vi) The system can also show transient  $\sim 18$  Hz saddle-cycle oscillation at the  
327 beginning of the seizure for high  $d\nu_{se}/dt$  before moving to the 10 Hz attractor. These  
328 saddle-cycles become more prominent as  $d\nu_{se}/dt$  increases; a system with  
329  $d\nu_{se}/dt < 7 \times 10^{-3}$  mV never exhibits saddle-cycles, whereas one with  
330  $d\nu_{se}/dt > 9 \times 10^{-3}$  mV always does.

331 Overall, the present study enables the varying spectral and temporal characteristics  
332 of seizures to be related to underlying physiological changes of the brain, such as changes  
333 in the connection strength between the cortex and the thalamus. The outcomes can be  
334 used for explaining the variability of seizure onset properties and seizure frequency  
335 across subjects by examining the temporal and spectral characteristics of seizure [39–41].  
336 It may thus be possible to constrain the physiological properties of the corticothalamic  
337 connection strength dynamics of a subject by comparing the wave properties of seizure  
338 oscillations, such as amplitude, and frequency, with theory. Real-time fitting of the  
339 theoretical dynamics to observed waveforms may also be feasible, leading to the  
340 possibility of implementing feedback control systems based on the dynamics.

## 341 **Methods**

342 In this section, we present a brief description of the corticothalamic neural field model  
343 used, along with the form of temporal variation of corticothalamic coupling  
344 strength [3, 4, 8].

### 345 **Corticothalamic Field Model**

346 To investigate the dynamics of tonic-clonic seizure, we use the neural field model of the  
347 corticothalamic system seen in Fig. 15. In this study we use the same analytical model  
348 of [33], but in different parametric regime suitable to study the tonic-clonic seizure. The  
349 neural populations are denoted as:  $e$  = excitatory cortical;  $i$  = inhibitory cortical;  $s$  =  
350 thalamic relay neurons;  $r$  = thalamic reticular nucleus; and  $n$  = external inputs. The

351 dynamical variables within each neural population  $a$  are the local mean cell-body  
 352 potential  $V_a$ , the mean rate of firing at the cell-body  $Q_a$ , and the propagating axonal  
 fields  $\phi_a$ . The firing rates  $Q_a$  are related to the potentials  $V_a$  by the response function

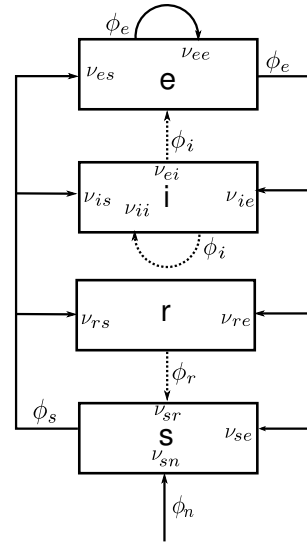

**Fig 15.** Schematic diagram of the corticothalamic model system. The neural populations shown are cortical excitatory ( $e$ ), inhibitory ( $i$ ), thalamic reticular ( $r$ ), thalamic relay ( $s$ ), and  $n =$  external inputs. The parameter  $\nu_{ab}$  quantifies the connection to population  $a$  from population  $b$ . Inhibitory connections are shown with dashed lines.

353

$$Q_a(\mathbf{r}, t) = S[V_a(\mathbf{r}, t)], \quad (11)$$

354 where  $S$  is a smooth sigmoidal function that increases from 0 to  $Q_{\max}$  as  $V_a$  increases  
 355 from  $-\infty$  to  $\infty$ , with

$$S(V_a) = \frac{Q_{\max}}{1 + \exp[-\pi(V_a - \theta)/\sigma\sqrt{3}]}, \quad (12)$$

356 where  $\theta$  is the mean neural firing threshold,  $\sigma$  is the standard deviation of this  
 357 threshold, and  $Q_{\max}$  is the maximum firing rate [3, 8].

358 In each neural population, firing rates  $Q_a$  generate propagating axonal fields  $\phi_a$  that  
 359 approximately obey the damped wave equation [3, 8]

$$D_a\phi_a(\mathbf{r}, t) = Q_a(\mathbf{r}, t), \quad (13)$$

360 where the spatiotemporal differential operator  $D_a$  is

$$D_a = \frac{1}{\gamma_a^2} \frac{\partial^2}{\partial t^2} + \frac{2}{\gamma_a} \frac{\partial}{\partial t} + 1 - r_a^2 \nabla^2, \quad (14)$$

361 where  $\gamma_a = v_a/r_a$  is the damping rate,  $r_a$  and  $v_a$  are the characteristic range and  
 362 conduction velocity of axons of type  $a$ , and  $\nabla^2$  is the Laplacian operator. The smallness  
 363 of  $r_i$ ,  $r_s$ , and  $r_r$  enables us to set  $\gamma_a \simeq \infty$  except for  $a = e$ . The cell-body potential  $V_a$   
 364 results after postsynaptic potentials have propagated through the dendritic tree and  
 365 then been summed as their resulting currents charge the soma. For excitatory and  
 366 inhibitory neurons within the cortex, this is approximated via the second-order  
 367 delay-differential equation [8]

$$D_\alpha V_a(\mathbf{r}, t) = \nu_{ae} \phi_e(\mathbf{r}, t) + \nu_{ai} \phi_i(\mathbf{r}, t) + \nu_{as} \phi_s(\mathbf{r}, t - t_0/2), \quad (15)$$

368 where  $a = e, i$  and the temporal differential operator is given by

$$D_\alpha = \frac{1}{\alpha\beta} \frac{d^2}{dt^2} + \left( \frac{1}{\alpha} + \frac{1}{\beta} \right) \frac{d}{dt} + 1. \quad (16)$$

369 The quantities  $\alpha$  and  $\beta$  in Eq. (16) are the inverse decay and rise times, respectively, of  
 370 the cell-body potential produced by an impulse at a dendritic synapse. Note that input  
 371 from the thalamus to the cortex is delayed in Eq. (15) by a propagation time  $t_0/2$ . For  
 372 neurons within the specific and reticular nuclei of the thalamus, it is the input from the  
 373 cortex that is time delayed, so

$$D_\alpha V_a(\mathbf{r}, t) = \nu_{ae} \phi_e(\mathbf{r}, t - t_0/2) + \nu_{as} \phi_s(\mathbf{r}, t) + \nu_{ar} \phi_r(\mathbf{r}, t) + \nu_{an} \phi_n(\mathbf{r}, t), \quad (17)$$

374 where  $a = s, r$ . The connection strengths are given by  $\nu_{ab} = N_{ab} s_{ab}$ , where  $N_{ab}$  is the  
 375 mean number of synapses to neurons of type  $a$  from type  $b$  and  $s_{ab}$  is the strength of  
 376 the response in neurons  $a$  to a unit signal from neurons of type  $b$ . The final term on the  
 377 right-hand side of Eq. (17) describes inputs from outside the corticothalamic system. In  
 378 order to simplify the model we only include the connections shown in Fig. 15, so only 10  
 379 of the possible 16 connections between the four neural populations are nonzero [8]. We  
 380 also assume the random intracortical connectivity and the number of connections

381 between populations is proportional to the number of synapses [42,43]. This random  
382 connectivity assumption provides  $N_{ib} = N_{eb}$  for all  $b$ , so  $\nu_{ee} = \nu_{ie}$ ,  $\nu_{ei} = \nu_{ii}$  and  
383  $\nu_{es} = \nu_{is}$  [30].

384 Setting all spatial and temporal derivatives in Eqs (12) – (17) to zero determines  
385 spatially uniform corticothalamic steady states. The steady state firing rate,  $\phi_e^{(0)}$  of  $\phi_e$   
386 is then given by [18]

$$S^{-1}(\phi_e^{(0)}) - (\nu_{ee} + \nu_{ei})\phi_e^{(0)} = \nu_{es}S\left\{\nu_{se}\phi_e^{(0)} + \nu_{sr}S\left[\nu_{re}\phi_e^{(0)} + (\nu_{rs}/\nu_{es})\left(S^{-1}(\phi_e^{(0)}) - (\nu_{ee} + \nu_{ei})\phi_e^{(0)}\right)\right] + \nu_{sn}\phi_n^{(0)}\right\}. \quad (18)$$

387 The properties of steady states in the corticothalamic model have been studied  
388 extensively in [8,18], and we use the outcomes to identify the stable and unstable  
389 regions of the steady state. Figure 16 shows the steady state dependence of  $\phi_e^{(0)}$  on  $\nu_{se}$   
390 with other parameters as in Table 1. It is seen that there are two stable steady state  
391 solutions: one corresponds to low mean firing rate and another to very high mean firing  
392 rate [18]. The low firing steady state was identified with normal states of brain activity  
393 in previous studies [8,26]. The low firing-rate fixed point loses its stability at  $\nu_{se} = \nu_\theta$ .  
394 A steep increase in  $\phi_e^{(0)}$  is seen near  $\nu_i$  because the increasing  $\nu_{se}$  push the sigmoid from  
395 its minimum by increasing the  $\nu_{se}\phi_e^{(0)}$  in Eq. (18), which results in an increase of the  
396 gain between the thalamus and the cortex. With further increase of  $\nu_{se}$ , the system  
397 eventually moves to a steady state with near-maximum firing rate. This high firing  
398 steady state is beyond the scope of our model because it will lead to effects such as  
399 hypoxia, which are not included here.

## 400 Temporal Ramping

401 Brain activity propagates via the coupling of the various neuronal populations. Previous  
402 studies have shown that a gradual ramp-up of the coupling strength between the  
403 neuronal populations can lead from a stable steady state to periodic seizure  
404 oscillations [3,33]. It is also seen that the dynamical and spectral characteristics of the  
405 resultant seizure-like oscillations depend on the physiological properties of the ramp of  
406 the coupling strength, such as, the maximum amplitude of the ramp, ramp rate, and  
407 characteristic duration [33].

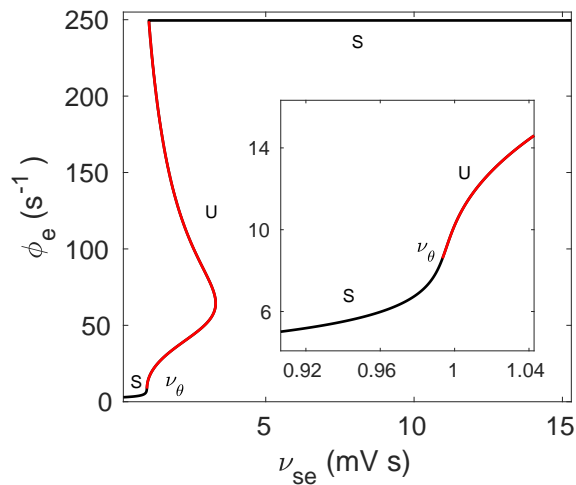

**Fig 16.** (color online) Steady states solution of the corticothalamic system for the variation of  $\nu_{se}$  for tonic-clonic seizure. Black lines and the letter ‘S’ represent the stable steady state, and red lines and the letter ‘U’ represent the unstable steady states. Here  $\nu_{\theta}$  is the threshold value when the stable steady state becomes unstable. The inset shows zoomed view of the area around  $\nu_{\theta}$ .

408 In this paper, we ramp the coupling strength  $\nu_{se}$  from an initial value  $\nu_0$  to a  
 409 maximum value  $\nu_{max}$  and back to see the impact of the ramp characteristics on  
 410 tonic-clonic seizures, with [33]

$$\nu_{se} = \nu_0 + (\nu_{max} - \nu_0) \left[ \frac{f(t) - f_{min}}{f_{max} - f_{min}} \right], \quad (19)$$

411

$$f(t) = \tan^{-1} \left[ \frac{t - t_1}{\Delta} \right] - \tan^{-1} \left[ \frac{t - t_2}{\Delta} \right], \quad (20)$$

412 where  $t$  is the time. The ramp rise is centered on  $t_1$ , and the ramp fall is centered on  $t_2$ ,  
 413 and  $\Delta$  is the characteristic rise time. Now,  $0 \leq f(t) \leq \pi$ , so we normalize by dividing by  
 414  $f_{max} - f_{min}$  as seen in Eq. (19), where  $f_{max}$  and  $f_{min}$  are the maximum and minimum  
 415 values of  $f(t)$  actually encountered in a given instance.

## 416 Numerical Methods

417 We use *NFTsim* [44] to solve Eqs (11) – (17) numerically for the spatially uniform case  
 418 in which the  $\nabla^2$  term in Eq. (14) is zero. To vary  $\nu_{se}$  temporally, we use Eqs (19) and  
 419 (20). This involves solving ordinary delay differential equations, because there is a



**Table 1.** Nominal parameters of the neural field model from [3].

| Parameter        | Value | Unit     | Meaning                                     |
|------------------|-------|----------|---------------------------------------------|
| $\nu_{ee}$       | 1.2   | mV s     | Excitatory corticocortical connectivity     |
| $\nu_{ei}$       | -1.8  | mV s     | Inhibitory corticocortical connectivity     |
| $\nu_{es}$       | 1.4   | mV s     | Specific thalamic to cortical connectivity  |
| $\nu_{re}$       | 0.2   | mV s     | Cortical to thalamic reticular connectivity |
| $\nu_{rs}$       | 0.2   | mV s     | Specific to reticular thalamic connectivity |
| $\nu_{se}$       | 1.0   | mV s     | Cortical to specific thalamic connectivity  |
| $\nu_{sr}$       | -1.0  | mV s     | Reticular to specific thalamic connectivity |
| $\nu_{sn}\phi_n$ | 2.0   | mV       | Subthalamic input                           |
| $Q_{\max}$       | 250   | $s^{-1}$ | Maximum firing rate                         |
| $\theta$         | 15    | mV       | Mean neuronal threshold                     |
| $\sigma$         | 6     | mV       | Threshold standard deviation                |
| $\gamma_e$       | 100   | $s^{-1}$ | Damping rate                                |
| $\alpha$         | 60    | $s^{-1}$ | Decay rate of membrane potential            |
| $\beta$          | 240   | $s^{-1}$ | Rise rate of membrane potential             |
| $t_0$            | 80    | ms       | Corticothalamic return time (complete loop) |
| $t_1$            | 100   | s        | Center of the ramp rise                     |
| $t_2$            | 200   | s        | Center of the ramp fall                     |
| $\nu_{\max}$     | 1.2   | mV s     | Maximum value of $\nu_{se}$                 |
| $\nu_0$          | 0.8   | mV s     | Minimum value of $\nu_{se}$                 |
| $\Delta$         | 10    | s        | Characteristic rise time                    |

420 propagation time delay  $t_0/2$  between the different neural populations present in Eqs  
 421 (15) and (17). Hence, a fourth-order Runge-Kutta integration is employed to solve these  
 422 equations, with an integration time step of  $10^{-4}$  s and store time histories of the delay  
 423 terms  $t_0/2$  into the past.

424 Because extensive comparisons with experiment have demonstrated that the normal  
 425 brain operates close to stable fixed points [3, 8, 18, 30, 32], we start our simulations from  
 426 a corticothalamic steady state with low firing rate. However, because of the delay time  
 427  $t_0/2$ , we must specify these initial steady-state conditions to apply for times  
 428  $-t_0/2 < t \leq 0$ .

429 We use the parameters in Table 1 as the initial parameters, which are taken from [3]  
430 with  $\nu_0 = 0.8$  mV s in all cases. A constant input  $\nu_{sn}\phi_n = 2$  mV is used and no external  
431 noise is applied in the simulations as the seizure onset occurs spontaneously.  
432 Simulations are 300 s long, and we record the output time series every 5 ms. For all  
433 simulations, we use the default parameters shown in Table 1 unless otherwise specified.  
434 The default parameters we used are the corresponding parameter set of [3] for  
435 tonic-clonic seizure which push the system into the vicinity of alpha instability. For the  
436 dynamic spectrum and power spectrum analysis, we employ the FFT (fast Fourier  
437 transform) algorithm with a Hanning window of 600 data points with an overlap of 200  
438 points and sampling frequency of 200 Hz.

## 439 Acknowledgments

This work was supported by the Australian Research Council Center of Excellence for Integrative Brain Function (ARC Center of Excellence Grant CE140100007) and by an Australian Research Council Laureate Fellowship (Grant FL140100025).

## References

1. Engel J, Pedley TA. Epilepsy: A comprehensive textbook. vol. 1. Lippincott-Raven, Philadelphia; 1997.
2. Browne TR, Holmes GL. Handbook of epilepsy. Lippincott Williams & Wilkins, Philadelphia; 2000.
3. Breakspear M, Roberts JA, Terry JR, Rodrigues S, Mahant N, Robinson PA. A unifying explanation of primary generalized seizures through nonlinear brain modeling and bifurcation analysis. *Cereb Cortex*. 2006;16(9):1296–1313.
4. Marten F, Rodrigues S, Benjamin O, Richardson MP, Terry JR. Onset of polyspike complexes in a mean-field model of human electroencephalography and its application to absence epilepsy. *Philos Trans R Soc A*. 2009;367(1891):1145–1161.

5. Roberts JA, Robinson PA. Modeling absence seizure dynamics: implications for basic mechanisms and measurement of thalamocortical and corticothalamic latencies. *J Theor Biol.* 2008;253(1):189–201.
6. Rodrigues S, Barton D, Szalai R, Benjamin O, Richardson MP, Terry JR. Transitions to spike-wave oscillations and epileptic dynamics in a human cortico-thalamic mean-field model. *J Comput Neurosci.* 2009;27(3):507–526.
7. Kim JW, Robinson PA. Compact dynamical model of brain activity. *Phys Rev E.* 2007;75(3):031907.
8. Robinson PA, Rennie CJ, Rowe DL. Dynamics of large-scale brain activity in normal arousal states and epileptic seizures. *Phys Rev E.* 2002;65(4):041924.
9. Chen M, Guo D, Wang T, Jing W, Xia Y, Xu P, et al. Bidirectional control of absence seizures by the basal ganglia: a computational evidence. *PLoS Comput Biol.* 2014;10(3):e1003495.
10. Velazquez JLP, Dominguez LG, Gaetz W, Cheyne D, Snead III OC, Wennberg R. Fluctuations in phase synchronization in brain activity: physiological interpretations of phase locking patterns. In: *Topical Problems of Nonlinear Wave Physics.* International Society for Optics and Photonics; 2006. p. 597510.
11. Lytton WW, Orman R, Stewart M. Computer simulation of epilepsy: implications for seizure spread and behavioral dysfunction. *Epilepsy Behav.* 2005;7(3):336–344.
12. Jirsa VK, Stacey WC, Quilichini PP, Ivanov AI, Bernard C. On the nature of seizure dynamics. *Brain.* 2014;137(8):2210–2230.
13. Dodrill CB. Correlates of generalized tonic-clonic seizures with intellectual, neuropsychological, emotional, and social function in patients with epilepsy. *Epilepsia.* 1986;27(4):399–411.
14. Andrew RD. Seizure and acute osmotic change: clinical and neurophysiological aspects. *J Neurol Sci.* 1991;101(1):7–18.

15. Hall D, Kuhlmann L. Mechanisms of seizure propagation in 2-dimensional centre-surround recurrent networks. *PLoS One*. 2013;8(8):e71369.
16. Kramer MA, Truccolo W, Eden UT, Lepage KQ, Hochberg LR, Eskandar EN, et al. Human seizures self-terminate across spatial scales via a critical transition. *Proc Natl Acad Sci USA*. 2012;109(51):21116–21121.
17. Staley K. Molecular mechanisms of epilepsy. *Nature Neurosci*. 2015;18(3):367.
18. Robinson PA, Rennie CJ, Rowe DL, O'Connor SC. Estimation of multiscale neurophysiologic parameters by electroencephalographic means. *Hum Brain Mapp*. 2004;23(1):53–72.
19. Yang DP, Robinson PA. Critical dynamics of Hopf bifurcations in the corticothalamic system: Transitions from normal arousal states to epileptic seizures. *Phys Rev E*. 2017;95(4):042410.
20. Kim JW, Roberts JA, Robinson PA. Dynamics of epileptic seizures: evolution, spreading, and suppression. *J Theor Biol*. 2009;257(4):527–532.
21. Deco G, Jirsa VK, Robinson PA, Breakspear M, Friston KJ. The dynamic brain: from spiking neurons to neural masses and cortical fields. *PLoS Comput Biol*. 2008;4(8):e1000092.
22. Pinotsis DA, Moran RJ, Friston KJ. Dynamic causal modeling with neural fields. *NeuroImage*. 2012;59(2):1261–1274.
23. Nunez PL. The brain wave equation: A model for the EEG. *Math Biosci*. 1974;21(3-4):279–297.
24. Freeman WJ. *Mass action in the nervous system*. Academic Press, New York; 1975.
25. Jirsa VK, Haken H. Field theory of electromagnetic brain activity. *Phys Rev Lett*. 1996;77(5):960–963.
26. Robinson PA, Rennie CJ, Wright JJ. Propagation and stability of waves of electrical activity in the Cereb. Cortex. *Phys Rev E*. 1997;56(1):826.

27. Rennie CJ, Robinson PA, Wright JJ. Unified neurophysical model of EEG spectra and evoked potentials. *Biol Cybern.* 2002;86(6):457–471.
28. Robinson PA, Whitehouse RW, Rennie CJ. Nonuniform corticothalamic continuum model of electroencephalographic spectra with application to split-alpha peaks. *Phys Rev E.* 2003;68(2):021922.
29. van Albada SJ, Kerr CC, Chiang AKI, Rennie CJ, Robinson PA. Neurophysiological changes with age probed by inverse modeling of EEG spectra. *Clin Neurophysiol.* 2010;121(1):21–38.
30. Abeysuriya RG, Rennie CJ, Robinson PA. Physiologically based arousal state estimation and dynamics. *J Neurosci Methods.* 2015;253:55–69.
31. Breakspear M, Terry JR, Friston KJ. Modulation of excitatory synaptic coupling facilitates synchronization and complex dynamics in a biophysical model of neuronal dynamics. *Network: Comp Neural Sci.* 2003;14(4):703–732.
32. Abeysuriya RG, Rennie CJ, Robinson PA. Prediction and verification of nonlinear sleep spindle harmonic oscillations. *J Theor Biol.* 2014;344:70–77.
33. Deeba F, Sanz-Leon P, Robinson PA. Dependence of absence seizure dynamics on physiological parameter evolution. *J Theor Biol.* 2018;454:11–21.
34. Deeba F, Sanz-Leon P, Robinson PA. Unified dynamics of interictal events and absence seizures. *Phys Rev E.* 2019;100(2):022407.
35. Schiff SJ, Colella D, Jacyna GM, Hughes E, Creekmore JW, Marshall A, et al. Brain chirps: spectrographic signatures of epileptic seizures. *Clin Neurophysiol.* 2000;111(6):953–958.
36. Jiruska P, De Curtis M, Jefferys JGR, Schevon CA, Schiff SJ, Schindler K. Synchronization and desynchronization in epilepsy: controversies and hypotheses. *J Physiol.* 2013;591(4):787–797.
37. Schiff SJ, Milton JG, Heller J, Weinstein SL. Wavelet transforms and surrogate data for electroencephalographic spike and seizure localization. *Optical Engineering.* 1994;33(7):2162–2170.

38. Soltesz I, Staley K. Computational neuroscience in epilepsy. Academic Press; 2011.
39. Köppen M, Kasabov N, Coghill G. Advances in Neuro-Information Processing: 15th International Conference, ICONIP 2008, Auckland, New Zealand, November 25-28, 2008, Revised Selected Papers. vol. 5507. Springer; 2009.
40. Tzallas AT, Tsipouras MG, Fotiadis DI. Epileptic seizure detection in EEGs using time–frequency analysis. *IEEE Trans Inf Technol Biomed.* 2009;13(5):703–710.
41. Cohen L. Time-frequency distributions-a review. *Proc IEEE.* 1989;77(7):941–981.
42. Liley DTJ, Cadusch PJ, Wright JJ. A continuum theory of electro-cortical activity. *Neurocomputing.* 1999;26:795–800.
43. Braitenberg V, Schüz A. *Cortex: statistics and geometry of neuronal connectivity.* Springer Science & Business Media; 2013.
44. Sanz-Leon P, Robinson PA, Knock SA, Drysdale PM, Abey Suriya RG, Fung PK, et al. NFTsim: theory and simulation of multiscale neural field dynamics. *PLoS Comput Biol.* 2018;14(8):e1006387.
